# Supplementary material for: Metabolic Model-Driven Optimization of Streptomyces Metabolic Network for High-Yield Production of Gougerotin
Source: Research Square preprint supplement (doi:10.21203/rs.3.rs-6962713/v1), 2025-07-10
Supplement: Supplementary file 1 [file 537a8c35be93c16bf4e88361.docx]

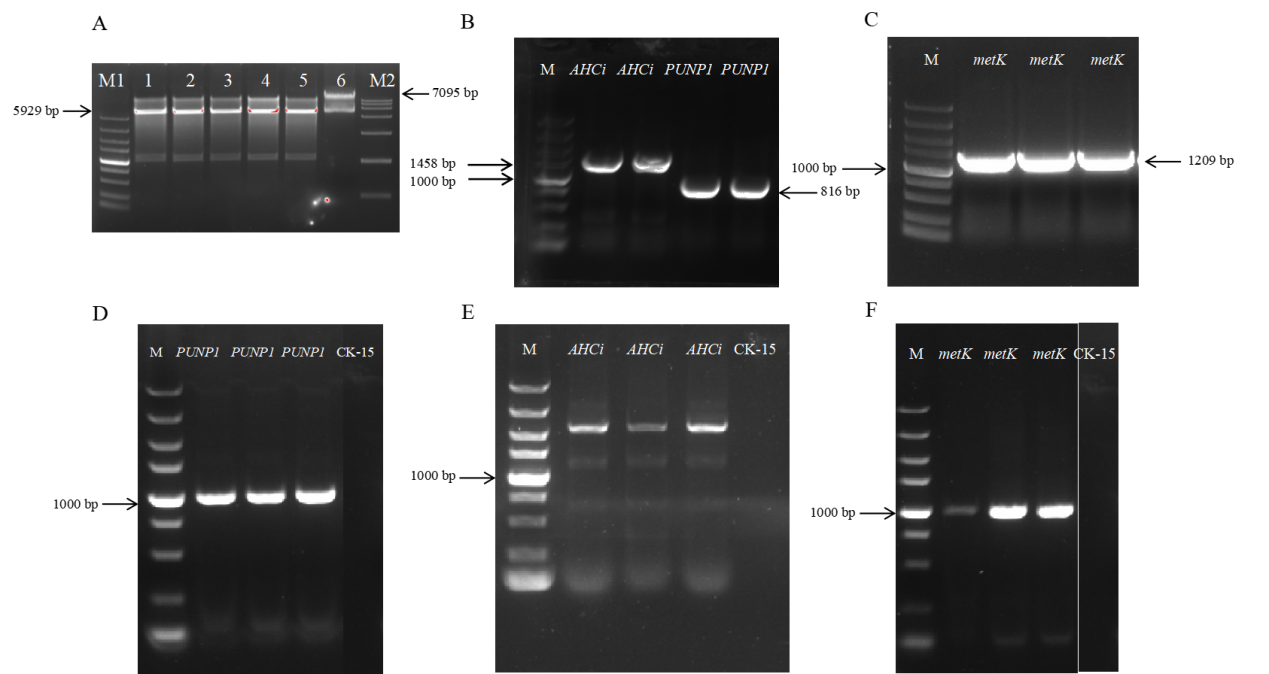


Fig S1.Construction and verification of overexpression vectors.

(A). Double digestion map of plasmid pLQ646. Lanes 1–5: Double digestion of plasmid with *EcoR*I and *Nde*I; Lane 6: Undigested pLQ646 plasmid; M1: DL5000 DNA marker; M2: DL15000 DNA marker. (B-C). PCR amplification of target gene fragments AHCi and PUNP1. AHCi: 1458 bp; PUNP1: 816 bp; metK: 1209 bp; M: DL5000 DNA marker. (D–F). Verification of overexpression strains for AHCi, metK, and PUNP1 in *Streptomyces*. M: DL5000 DNA marker; D: pLQ646-metK (1388 bp); E: pLQ646-AHCi (1637 bp); F: pLQ646-PUNP1 (995 bp).

Table S1 Strains and plasmids used in this study

| Strain | Description | Source |
| --- | --- | --- |
| *S.nuorsei* CK-15 | Glucocin-producing strain, wild-type strain | This laboratory |
| *OE AHCi* | CK-15 overexpression gene AHCi | This work |
| *OE PNP* | CK-15 overexpression gene PNP | This work |
| *OE metK* | CK-15 overexpression gene metK | This work |
| pLQ646 | Plasmid pSET152 modified, containing the kasO*p strong promoter plasmid shuttle vector for overexpression strain construction | Gift from Shenzhen Institute of Advanced Technology, Chinese Academy of Sciences |

Table S2 Primer

| Primer Name | Sequence 5'-3' | Product Size | Use |
| --- | --- | --- | --- |
| AHCi-L | TGAAGAGGTGACGTCCATATGATGACGACAGCAGCCACC | 1458 bp | Amplification of *AHCi* target sequence |
| AHCi-R | CTATGACATGATTACGAATTCTCAGTAGCGGTAGTGGTCGG |
| PNP-L | TGAAGAGGTGACGTCCATATGGTGAACGCATCTGTTACCCC | 816 bp | Amplification of *PNP* target sequence |
| PNP-R | CTATGACATGATTACGAATTCCTAGATCTTGCTGAGGACCTGG |
| 152-Long-F | GATTAAGTTGGGTAACGCCA | 908 bp | Verification primers |
| 152-Long-R | GGACAGGTATCCGGTAAGCG |

Table S3 Time table

| Time | A相：5mM乙酸铵水 | B相：乙腈 | 流速 |
| --- | --- | --- | --- |
| 0.00 | 10 | 90 | 0.3 mL/min |
| 8.00 | 50 | 50 | 0.3 mL/min |
| 10.00 | 50 | 50 | 0.3 mL/min |
| 11.00 | 10 | 90 | 0.3 mL/min |
| 17.00 | 10 | 90 | 0.3 mL/min |

Table S4 ACQUITY UPLC BEH Amide Column Flushing Method

| Time | 水 | 乙腈 | 流速 |
| --- | --- | --- | --- |
| 0.00 | 40 | 60 | 0.3 mL/min |
| 0.00 | 40 | 60 | 0.3 mL/min |
| 10.00 | 40 | 60 | 0.3 mL/min |
| 11.00 | 10 | 90 | 0.3 mL/min |
| 20.00 | 10 | 90 | 0.3 mL/min |
| 21.00 | 40 | 60 | 0.3 mL/min |
| 30.00 | 40 | 60 | 0.3 mL/min |
| 31.00 | 10 | 90 | 0.3 mL/min |
| 50.00 | 10 | 90 | 0.3 mL/min |
| 51.00 | 40 | 60 | 0.3 mL/min |
| 60.00 | 40 | 60 | 0.3 mL/min |
| 61.00 | 10 | 90 | 0.3 mL/min |
| 100.00 | 10 | 90 | 0.3 mL/min |

Table S5 MRM Conditions

| Compound Name | Precursor Ion | Product Ion | Dwell | Fragmentor | Collision Energy | Cell Accelerator Voltage | Polarity |
| --- | --- | --- | --- | --- | --- | --- | --- |
| gougerotin | 444.1 | 333 | 60 | 100 | 13 | 4 | Positive |
| gougerotin | 444.1 | 315.1 | 60 | 100 | 19 | 4 | Positive |
| gougerotin | 444.1 | 243.9 | 60 | 100 | 28 | 4 | Positive |
| gougerotin | 444.1 | 138.9 | 60 | 100 | 34 | 4 | Positive |
| gougerotin | 444.1 | 121.9 | 60 | 100 | 55 | 4 | Positive |
| gougerotin | 444.1 | 111.9 | 60 | 100 | 49 | 4 | Positive |
| gougerotin | 444.1 | 44 | 60 | 100 | 58 | 4 | Positive |

Table S6 Significantly upregulated proteins in *AHCi* overexpression strain

| Locus_tag | Funcation | Protein ID | Ratio |
| --- | --- | --- | --- |
| SE95_RS26160 | NAD(+) diphosphatase | WP_016576226.1 | 4.117937175 |
| SE95_RS24610 | aldehyde dehydrogenase family protein | WP_016576230.1 | 3.389668631 |
| SE95_RS08985 | cold-shock protein | WP_016575107.1 | 2.949599049 |
| SE95_RS01465 | 5-formylfuran-3-yl)methyl phosphate synthase | WP_037635452.1 | 2.64338242 |
| SE95_RS36825 | alkaline phosphatase family protein | WP_016573628.1 | 2.495529571 |
| SE95_RS28640 | SpoIIE family protein phosphatase | WP_232817154.1 | 2.415290642 |
| SE95_RS37760 | amidase domain-containing protein | WP_232817367.1 | 2.413964846 |
| SE95_RS09005 | PTS fructose subfamily transporter subunit IIA | WP_016570410.1 | 2.333108207 |
| SE95_RS22110 | M3 family metallopeptidase | WP_078948826.1 | 2.292163267 |
| SE95_RS01340 | amidohydrolase family protein | WP_044371827.1 | 2.284837293 |
| SE95_RS05775 | Wzz/FepE/Etk N-terminal domain-containing protein | WP_016575847.1 | 2.216948606 |
| SE95_RS14950 | DUF742 domain-containing protein | WP_016575340.1 | 2.179455341 |
| SE95_RS23915 | haloacid dehalogenase-like hydrolase | WP_016575640.1 | 2.174167873 |
| SE95_RS15425 | amino acid permease | WP_016574030.1 | 2.163408982 |
| SE95_RS09505 | hypothetical protein | WP_016571762.1 | 2.133112751 |
| SE95_RS18920 | 50S ribosomal protein L33 | WP_016578602.1 | 2.020215495 |

Table S7 Significantly down regulated proteins in *AHCi* overexpression strain

| Locus_tag | Funcation | Protein ID | Ratio |
| --- | --- | --- | --- |
| SE95_RS33070 | 7-cyano-7-deazaguanine synthase QueC | WP_016570258.1 | 0.452585492 |
| SE95_RS14910 | transcriptional repressor | WP_016578370.1 | 0.41095287 |

Table S8 Significantly upregulated proteins in *PNP* overexpression strain

| Locus_tag | Funcation | Protein ID | Ratio |
| --- | --- | --- | --- |
| SE95_RS39255 | Family 2 encapsulin nanocompartment cargo protein terpene cyclase | WP_038524797.1 | 6.152293218 |
| SE95_RS31245 | Hypothetical protein | WP_044370483.1 | 4.138558457 |
| SE95_RS26160 | NAD(+) diphosphatase | WP_016576226.1 | 3.548055627 |
| SE95_RS29775 | Hypothetical protein | WP_038522302.1 | 3.184565634 |
| SE95_RS07115 | HNH endonuclease family protein | WP_044372714.1 | 2.960054439 |
| SE95_RS12540 | SidA/IucD/PvdA family monooxygenase | WP_020931373.1 | 2.829631444 |
| SE95_RS25050 | Purine-nucleoside phosphorylase | WP_016575475.1 | 2.804936762 |
| SE95_RS28880 | M1 family metallopeptidase | WP_016572962.1 | 2.716787514 |
| SE95_RS28640 | SpoIIE family protein phosphatase | WP_232817154.1 | 2.51443785 |
| SE95_RS10585 | ABC transporter permease/substrate binding protein | WP_016570850.1 | 2.483899531 |
| SE95_RS09005 | PTS fructose subfamily transporter subunit IIA | WP_016570410.1 | 2.468718842 |
| SE95_RS01340 | Amidohydrolase family protein | WP_044371827.1 | 2.348812777 |
| SE95_RS11490 | DNA repair protein RecN | WP_044374729.1 | 2.307053388 |
| SE95_RS23080 | DUF47 family protein | WP_016570948.1 | 2.274505718 |
| SE95_RS09505 | Hypothetical protein | WP_016571762.1 | 2.271550407 |
| SE95_RS30145 | Malto-oligosyltrehalose synthase | WP_020931396.1 | 2.211748705 |
| SE95_RS23930 | 1,4-dihydroxy-6-naphthoate synthase | WP_020930878.1 | 2.134604814 |
| SE95_RS36660 | TetR/AcrR family transcriptional reguLator | WP_044378094.1 | 2.11293237 |
| SE95_RS03095 | Hypothetical protein | WP_044370696.1 | 2.07548541 |
| SE95_RS14985 | Protealysin inhibitor emfourin | WP_016577594.1 | 2.055329713 |
| SE95_RS28670 | CDP-diacylglycerol-glycerol-3-phosphate 3-phosphatidyltransferase | WP_016571082.1 | 2.055071874 |
| SE95_RS14305 | HpcH/HpaI aldolase/citrate lyase family protein | WP_038519091.1 | 2.045855776 |

Table S9 Significantly down regulated proteins in the *PNP* overexpressing strain

| Locus_tag | Funcation | Protein ID | Ratio |
| --- | --- | --- | --- |
| SE95_RS34150 | Phosphatidylinositol-specific phospholipase C domain-containing protein | WP_044373974.1 | 0.433993882 |
| SE95_RS14910 | Transcriptional repressor | WP_016578370.1 | 0.392919542 |
| SE95_RS12740 | Fumarate reductase/succinate dehydrogenase flavoprotein subunit | WP_016573055.1 | 0.210121609 |

Table S10 Significantly upregulated proteins in the *metK* overexpressing strain

| Locus_tag | Funcation | Protein ID | Ratio |
| --- | --- | --- | --- |
| SE95_RS39250 | Family 2B encapsulin nanocompartment shell protein | WP_053164482.1 | 5.796071206 |
| SE95_RS00210 | Alkyl suLfatase dimerization domain-containing protein | WP_198602790.1 | 5.625353514 |
| SE95_RS39255 | Family 2 encapsulin nanocompartment cargo protein terpene cyclase | WP_038524797.1 | 4.671073528 |
| SE95_RS31245 | Hypothetical protein | WP_044370483.1 | 4.157423097 |
| SE95_RS03075 | Hypothetical protein | WP_044370704.1 | 3.867391437 |
| SE95_RS29775 | Hypothetical protein | WP_038522302.1 | 3.727238571 |
| SE95_RS07115 | HNH endonuclease family protein | WP_044372714.1 | 3.666533881 |
| SE95_RS37135 | HutD family protein | WP_044380435.1 | 2.99517379 |
| SE95_RS02355 | Peptidase S1 | WP_103377141.1 | 2.94272762 |
| SE95_RS28880 | M1 family metallopeptidase | WP_016572962.1 | 2.744755138 |
| SE95_RS37760 | Amidase domain-containing protein | WP_232817367.1 | 2.662666637 |
| SE95_RS10585 | ABC transporter permease/substrate binding protein | WP_016570850.1 | 2.648804559 |
| SE95_RS04110 | SH3 domain-containing protein | WP_016573302.1 | 2.596653061 |
| SE95_RS24295 | DUF4239 domain-containing protein | WP_016576019.1 | 2.534627351 |
| SE95_RS25645 | Exodeoxyribonuclease VII large subunit | WP_045788104.1 | 2.518856143 |
| SE95_RS01340 | Amidohydrolase family protein | WP_044371827.1 | 2.514696567 |
| SE95_RS09775 | RibuLose-phosphate 3-epimerase | WP_016570654.1 | 2.490568882 |
| SE95_RS42080 | DUF6603 domain-containing protein | WP_157955253.1 | 2.460834572 |
| SE95_RS23080 | DUF47 family protein | WP_016570948.1 | 2.455028273 |
| SE95_RS15715 | Hypothetical protein | WP_044375297.1 | 2.428400358 |
| SE95_RS09505 | Hypothetical protein | WP_016571762.1 | 2.364308859 |
| SE95_RS09450 | Amidase | WP_053163764.1 | 2.343837622 |
| SE95_RS19980 | DUF2617 family protein | WP_016578355.1 | 2.273238594 |
| SE95_RS09515 | Oxygenase MpaB family protein | WP_232817053.1 | 2.246728032 |
| SE95_RS40870 | Hypothetical protein | WP_157955255.1 | 2.203484193 |
| SE95_RS21535 | SSI family serine proteinase inhibitor | WP_016571170.1 | 2.175771824 |
| SE95_RS03095 | Hypothetical protein | WP_044370696.1 | 2.131388409 |
| SE95_RS04760 | Endonuclease/exonuclease/phosphatase family protein | WP_103377162.1 | 2.075794926 |
| SE95_RS10090 | CDP-alcohol phosphatidyltransferase family protein | WP_044373873.1 | 2.058003914 |
| SE95_RS10900 | Chaplin | WP_037637058.1 | 2.046601922 |
| SE95_RS36300 | Hypothetical protein | WP_016573949.1 | 2.040898899 |

Table S11 Significantly down regulated proteins in the *metK* overexpressing strain

| Locus_tag | Funcation | Protein ID | Ratio |
| --- | --- | --- | --- |
| SE95_RS39575 | Acyl-CoA reductase | WP_038524881.1 | 0.131497367 |
| SE95_RS39570 | Acyl-protein synthase | WP_053164405.1 | 0.181208882 |
| SE95_RS35610 | Cytochrome P450 | WP_232817361.1 | 0.247914267 |
| SE95_RS06330 | MbtH family NRPS accessory protein | WP_044372887.1 | 0.274162962 |
| SE95_RS11390 | Lysophospholipid acyltransferase family protein | WP_016573450.1 | 0.30823013 |
| SE95_RS31010 | Type I-E CRISPR-associated protein Cse1/CasA | WP_044377871.1 | 0.332896225 |
| SE95_RS26345 | Mycothiol system anti-sigma-R factor | WP_016573167.1 | 0.353937856 |
| SE95_RS09965 | DUF948 domain-containing protein | WP_174505055.1 | 0.36480767 |
| SE95_RS38130 | Universal stress protein | WP_103377394.1 | 0.367428562 |
| SE95_RS34580 | Cytochrome P450 | WP_198602915.1 | 0.404218943 |
| SE95_RS31250 | Hypothetical protein | WP_103377348.1 | 0.443018011 |

Table 12. Names and Abbreviations of Metabolites Related to the Biosynthetic Pathway of gougerotin

| Abbreviation | Metabolite |
| --- | --- |
| udpglcur | UDP-D-glucuronate |
| csn | cytosine |
| CGA | Cytosylglucuronic acid (Cytosylglucurate) |
| 4cbCGA | 4-carbonyl-Cytosylglucuronic acid |
| ser__D | D-serine |
| serycoa | seryl-CoA |
| 2amsald | 2-aminomalonate semialdehyde |
| 4aCGA | 4-amino-CGA |
| serylCGA | seryl-CGA (compound 3) |
| glycylcoa | glycyl-CoA |
| amet | SAM |
| sarcslcoa | sarcosyl-CoA |
| ynmcn | yunnanmycin |
| goug | gougerotin |
